# Supplementary material for: Natural hybridization between two butterfly bushes in Tibet: dominance of F1 hybrids promotes strong reproductive isolation
Source: PubMed Central journal article supplement (PMC7945306; doi:10.1186/s12870-021-02909-7), 2021-03-10

$$\text{DeltaK} = \text{mean}(|L''(K)|) / \text{sd}(L(K))$$

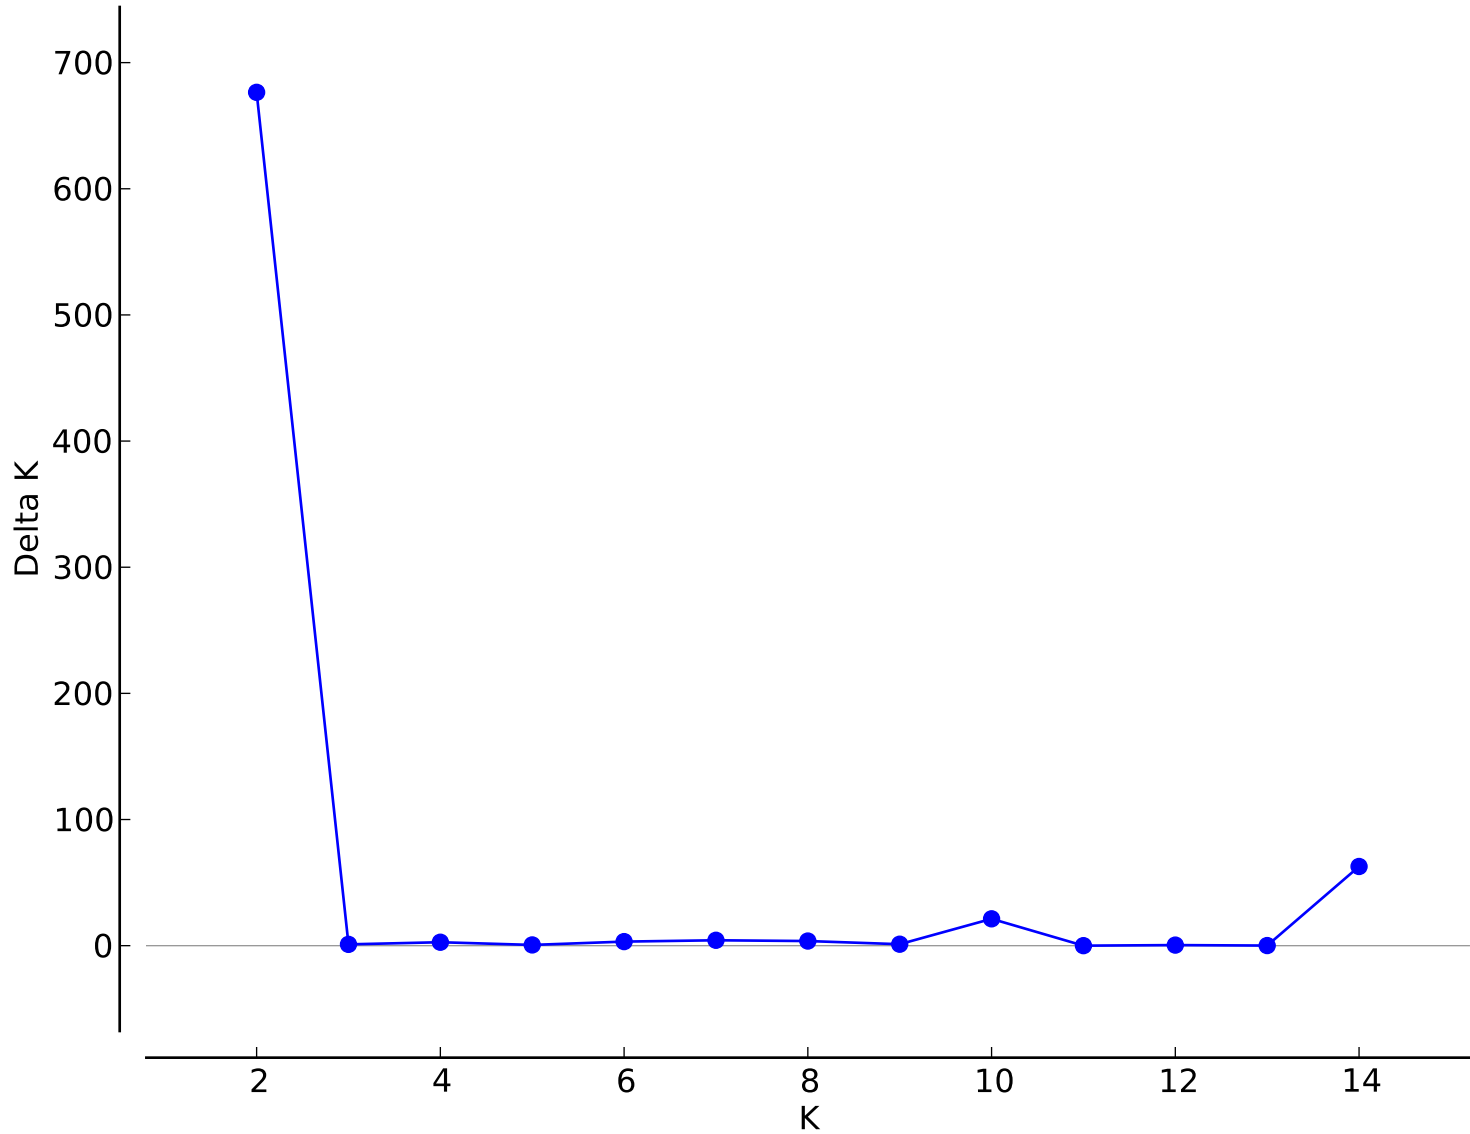

Supplement: 12870_2021_2909_MOESM10_ESM.pdf [file 12870_2021_2909_MOESM10_ESM.pdf]
