# Supplementary material for: Natural hybridization between two butterfly bushes in Tibet: dominance of F1 hybrids promotes strong reproductive isolation
Source: BMC Plant Biol. 2021 Mar 10;21:133. doi: 10.1186/s12870-021-02909-7 (PMC7945306; doi:10.1186/s12870-021-02909-7)
Supplement: Supplementary file 3 — Additional file 3: Table S3. Specimens information for the three Buddleja taxa in the study. [file 12870_2021_2909_MOESM3_ESM.xlsx]

## Sheet: Sheet1
Table S3 Specimens information of the three Buddleja taxa in the study
Species	Voucher No.	Locality information	Longitude(E)	Latitude(N)	Altitute(m)
B. alternifolia	LRL17001	Bahe, Nyingchi, Tibet, China	93°14'0.50"	29°52'58.54"	3434
B. crispa	LRL17002	Bahe, Nyingchi, Tibet, China	93°14'0.50"	29°52'58.54"	3434
B. × wardii	LRL17003	Bahe, Nyingchi, Tibet, China	93°14'0.50"	29°52'58.54"	3434
B. alternifolia	LRL17004	Taji, Lhasa, Tibet, China	91°26'56.97"	29°44'56.15"	3725
B. crispa	LRL17005	Taji, Lhasa, Tibet, China	91°26'56.97"	29°44'56.15"	3725
B. × wardii	LRL17006	Taji, Lhasa, Tibet, China	91°26'56.97"	29°44'56.15"	3725
B. crispa	LRL16001	Basu, Qamdo, Tibet, China	97°18'10.20"	30°07'10.34"	3733
B. crispa	LRL13001	Xishan, Kunming, Yunnan, China	102°38'17.36"	24°57'14.00"	2227
B. alternifolia	LRL17007	Jiangzhi, Rikaze, Tibet, China	89°26'25.09"	29°2'3.28"	3947
B. alternifolia	LRL18001	Kangding, Tibetan Autonomous Prefecture of Garzê, Sichuan, China	101°30'48.75"	29°45'0.10"	3297
